# Supplementary material for: Water assisted anion chains and anion dependent fluorescence emission in salts of N,N′-bis(3-imidazol-1-ylpropyl)naphthalenediimide
Source: Royal Society of Chemistry journal article supplement (doi:10.1039/c3nj00034f), 2013-01-01
Supplement: c3nj00034f.pdf [file c3nj00034f.pdf]

## Supporting information

### Materials and methods

The 1,4,5,8-naphthalenetetracarboxylic dianhydride and 3-(1H-imidazol-1-yl)propan-1-amine are purchased from Sigma-Aldrich (USA). The  $^1\text{H-NMR}$  spectra were recorded on a Varian FT 400 MHz instrument. The chemical shifts are in parts per million (ppm) on the scale using tetramethylsilane as a reference. The IR spectra were recorded on a Perkin Elmer Spectrum One FT-IR spectrometer with KBr disks in the range  $4000\text{-}450\text{ cm}^{-1}$ . Fluorescence spectra are recorded with Perkin Elmer spectrometer LS 55. Powder X-ray Diffraction (PXRD) are recorded with Bruker D2 phaser with  $\text{CuK}\alpha$  source ( $\lambda = 154\text{ \AA}$ ) on a glass surface of air dried sample and thermo-gravimetric analysis are recorded with TA instrument with model SDTQ600 using aluminium pan with a temperature of  $5^\circ/\text{minute}$ .

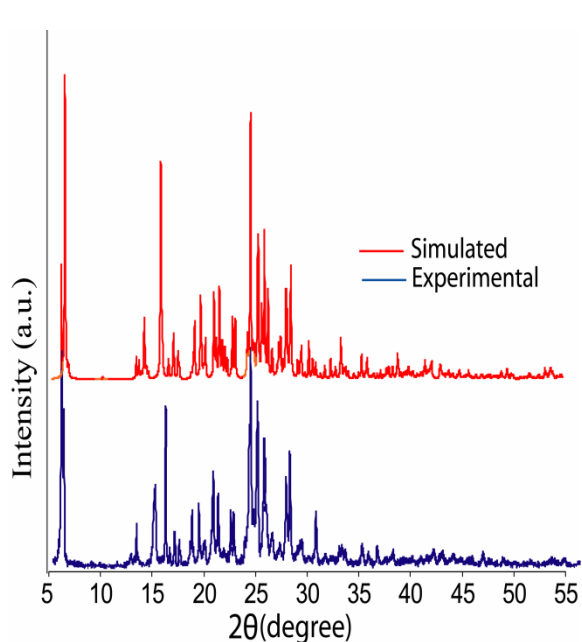

(a)

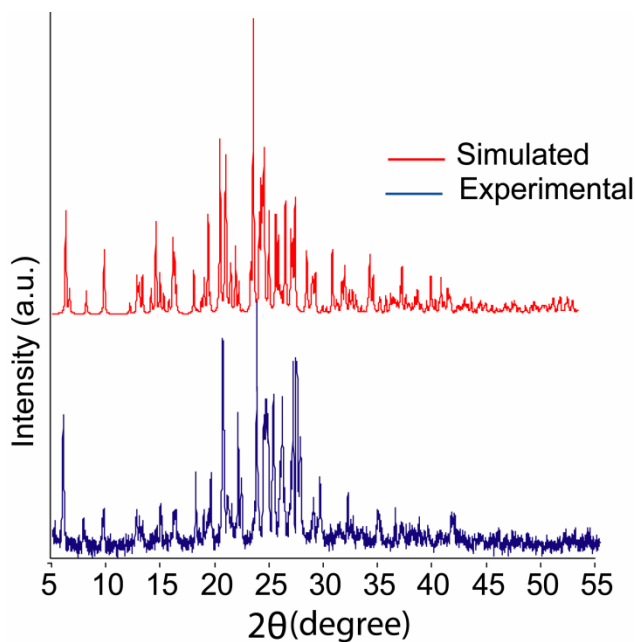

(b)

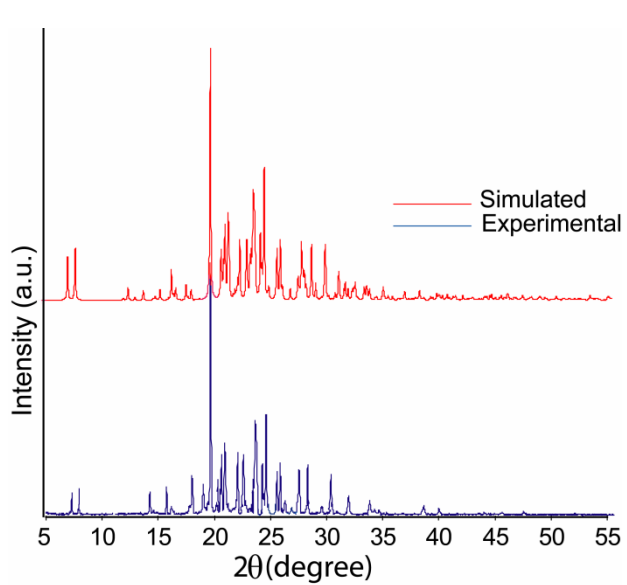

(c)

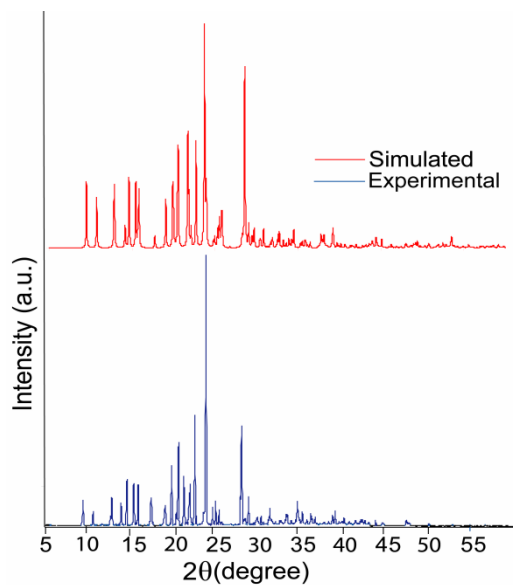

(d)

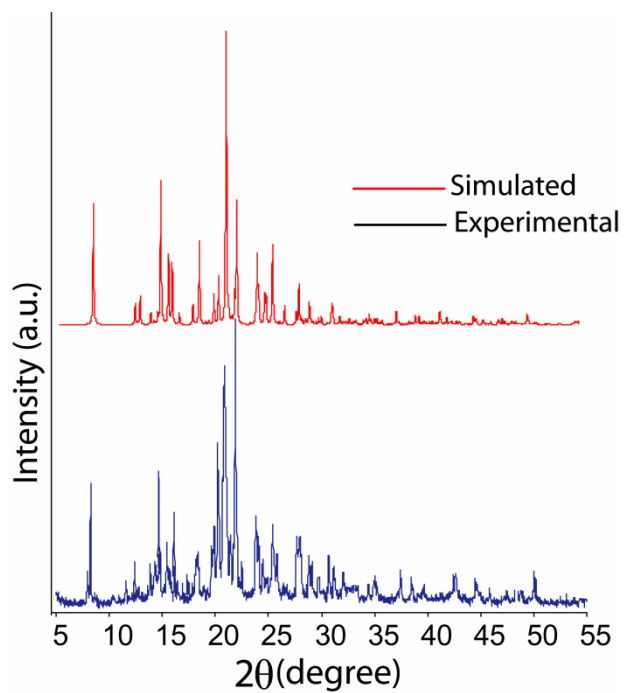

(e)

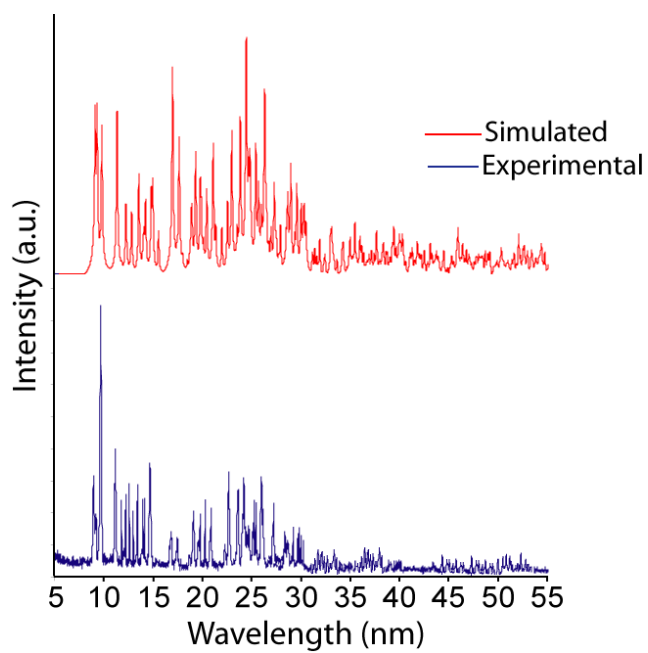

(f)

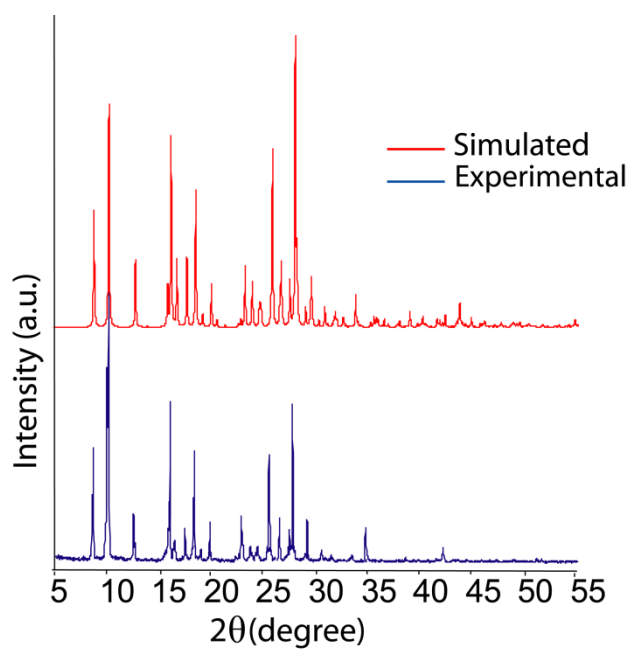

(g)

Fig. S1: PXRD pattern of simulated (red) with experimental (blue) of (a) Chloride, (b) bromide, (c) perchlorate, (d) bisulphate, (e) methyl sulphate and (f) Hydrogen phosphate salt (g) nitrate salt.

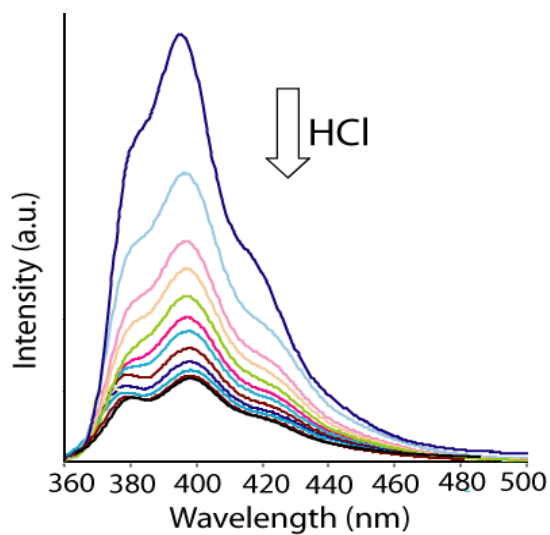

(a)

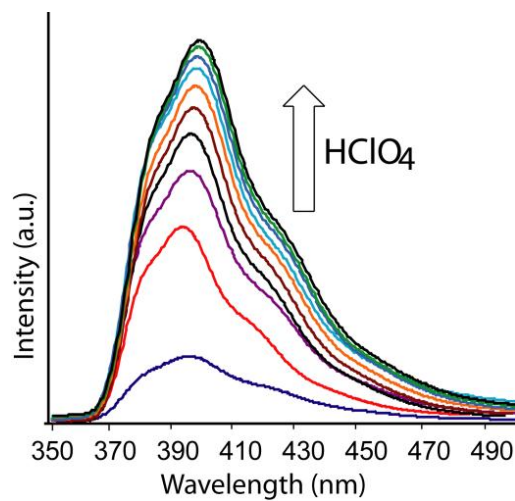

(b)

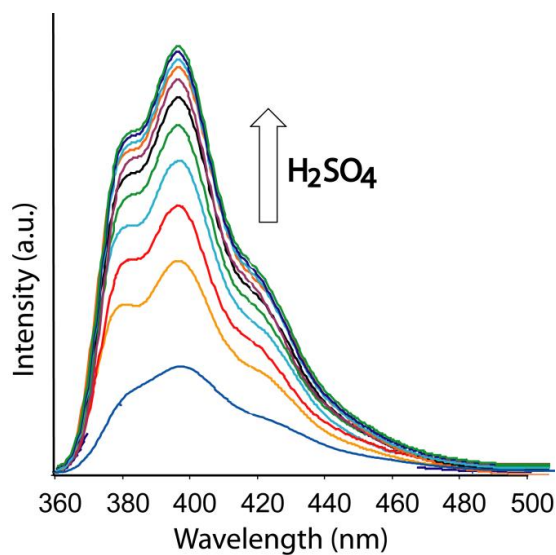

(c)

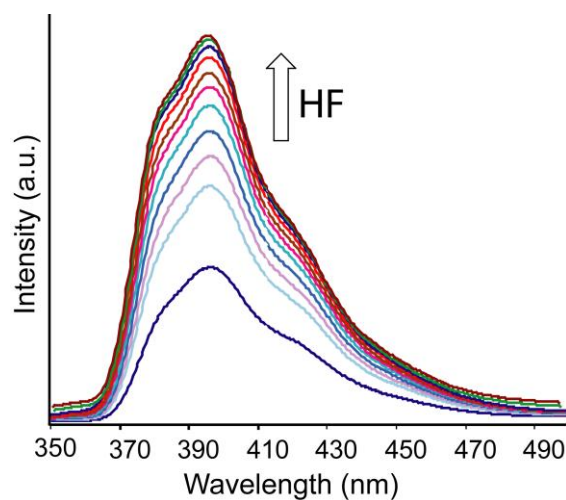

(d)

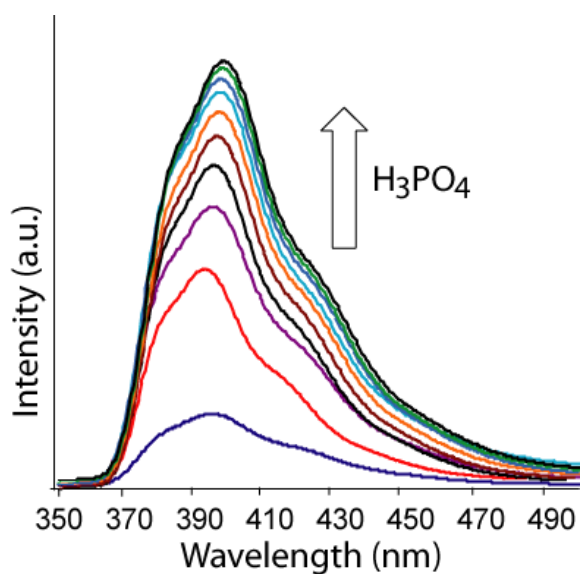

(e)

Fig. 2S: Changes in fluorescence emission intensity ( $\lambda_{\text{ex}} = 340\text{nm}$ ) of **L** (2ml of  $10^{-5}\text{M}$  solution in methanol) with (a) HCl, (b) HClO<sub>4</sub>, (c) H<sub>2</sub>SO<sub>4</sub>, (d) HF and (e) H<sub>3</sub>PO<sub>4</sub> (10  $\mu\text{l}$  in each aliquot from each of the acid solution of concentration  $10^{-2}\text{M}$  each)

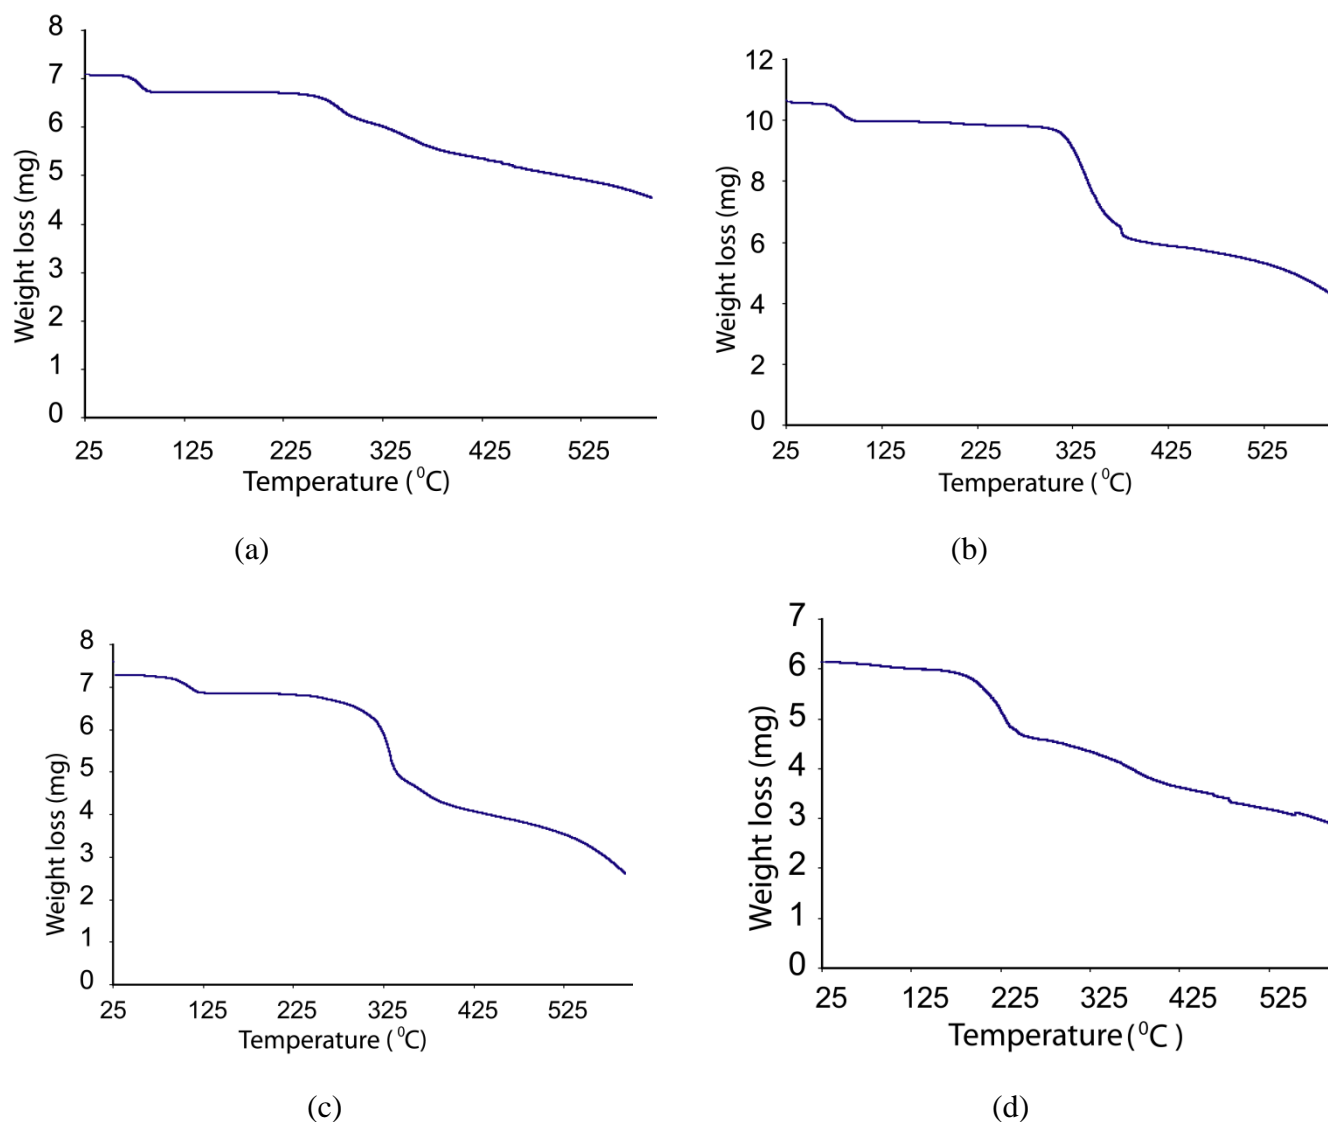

Fig. 3S: Thermo gravimetric analysis diagram of the salt (a) chloride, (b) bromide, (c) bisulphate and (d) hexa-fluorosilicate. The thermogravimetry of the hydrated salt **1** shows loss of water molecules below 74-94°C (wt. loss exptal 5.24%, theoretical 6.09%) and **2** shows it at 70-102°C (wt. loss exptal 5.16%, theoretical 5.29%). Whereas in the case complex **4**, the water of crystallization is lost at around 94-130°C (wt. loss exptal 4.86%, theoretical 5.03%), in this case water molecules are attached to dimeric assemblies of the anions. In the case of **8** no water molecules are lost at low temperature; the weight loss occurs around 192°C probably due to loss of hydrofluoric acid.

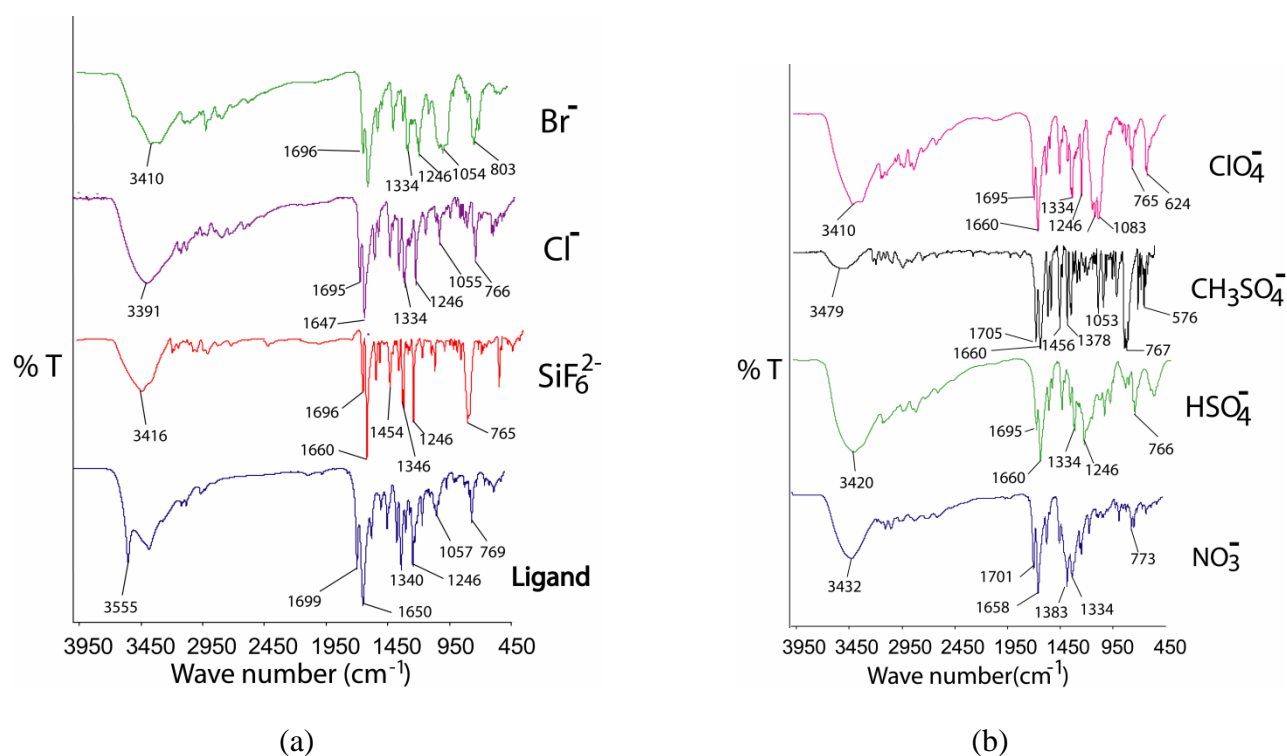

Fig. 4S: IR spectra of the **L** and its different salts (The salts of **L** are denoted by the anions in figures).

Table S1: Crystallographic parameters of salt **8**

|                                |                                                                                  |
|--------------------------------|----------------------------------------------------------------------------------|
| Compound No.                   | Salt <b>8</b>                                                                    |
| Formulae                       | $\text{C}_{104}\text{H}_{102}\text{F}_{24}\text{N}_{24}\text{O}_{19}\text{Si}_4$ |
| Mol. wt.                       | 2560.60                                                                          |
| Crystal system                 | Monoclinic                                                                       |
| Space group                    | $\text{P2}_1/\text{c}$                                                           |
| Temperature /K                 | 298(2)                                                                           |
| Wavelength /Å                  | 0.71073                                                                          |
| $a/\text{Å}$                   | 19.277(6)                                                                        |
| $b/\text{Å}$                   | 9.226(3)                                                                         |
| $c/\text{Å}$                   | 34.761(10)                                                                       |
| $\alpha/^\circ$                | 90.00                                                                            |
| $\beta/^\circ$                 | 116.698(19)                                                                      |
| $\gamma/^\circ$                | 90.00                                                                            |
| $V/\text{Å}^3$                 | 5523(3)                                                                          |
| Z                              | 2                                                                                |
| Density/ $\text{Mgm}^{-3}$     | 1.536                                                                            |
| Abs. Coeff. / $\text{mm}^{-1}$ | 0.175                                                                            |
| F(000)                         | 2624                                                                             |
| Total no. of reflections       | 9817                                                                             |
| Reflections, $I > 2\sigma(I)$  | 3639                                                                             |
| Max. $2\theta/^\circ$          | 50.50                                                                            |
| Ranges (h, k, l)               | $-23 \leq h \leq 23$<br>$-11 \leq k \leq 10$<br>$-41 \leq l \leq 41$             |
| Complete to $2\theta$ (%)      | 98.6                                                                             |
| Data/<br>Restraints/Parameters | 9817 / 0 / 793                                                                   |
| Goof ( $F^2$ )                 | 1.116                                                                            |
| R indices [ $I > 2\sigma(I)$ ] | 0.0817                                                                           |
| R indices (all data)           | 0.1156                                                                           |
| $wR_2[I > 2\sigma(I)]$         | 0.1765                                                                           |
| $wR_2(\text{all data})$        | 0.2460                                                                           |

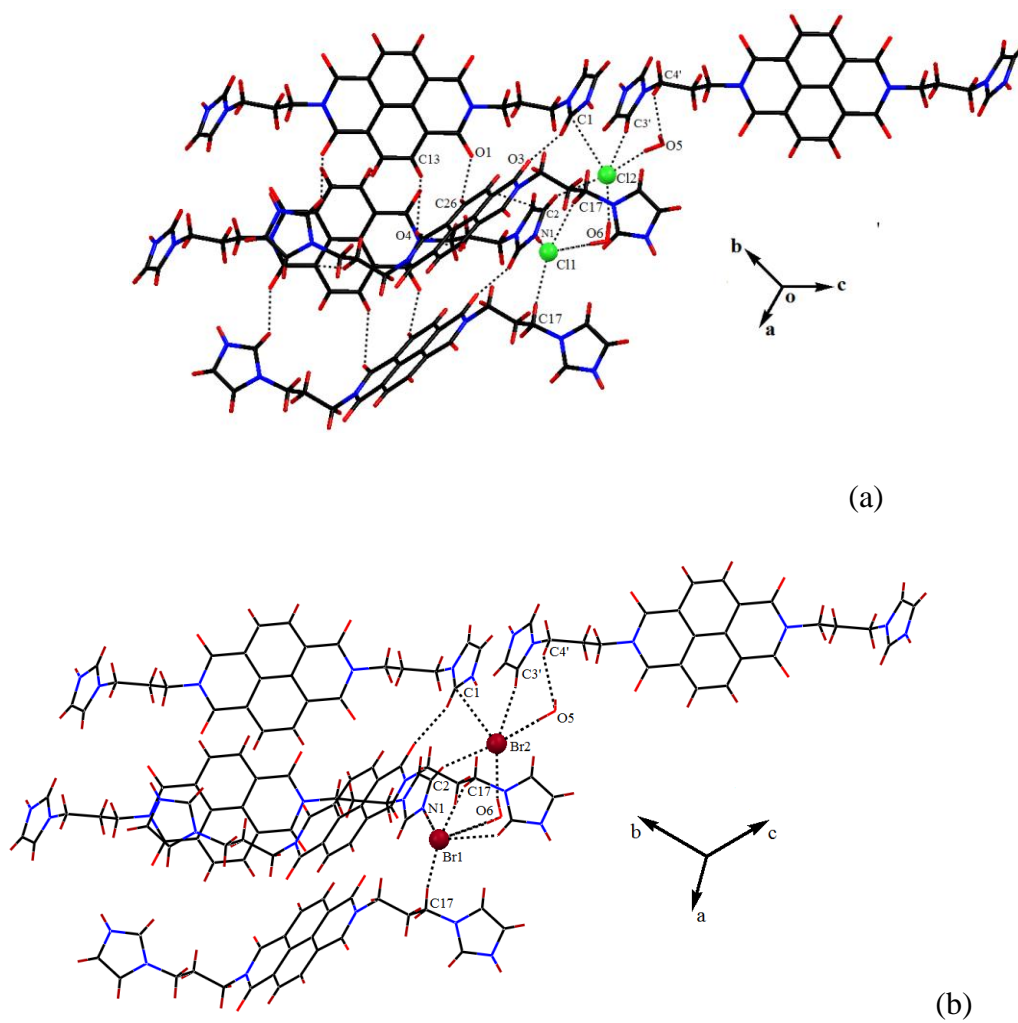

Fig. 4S (a) Coordination environment of chloride ions in salt **1**; and (b) Coordination environment of bromide ions in the salt **2**. [Equivalent atoms are generated by  $(-x, -y, -z)$ ]

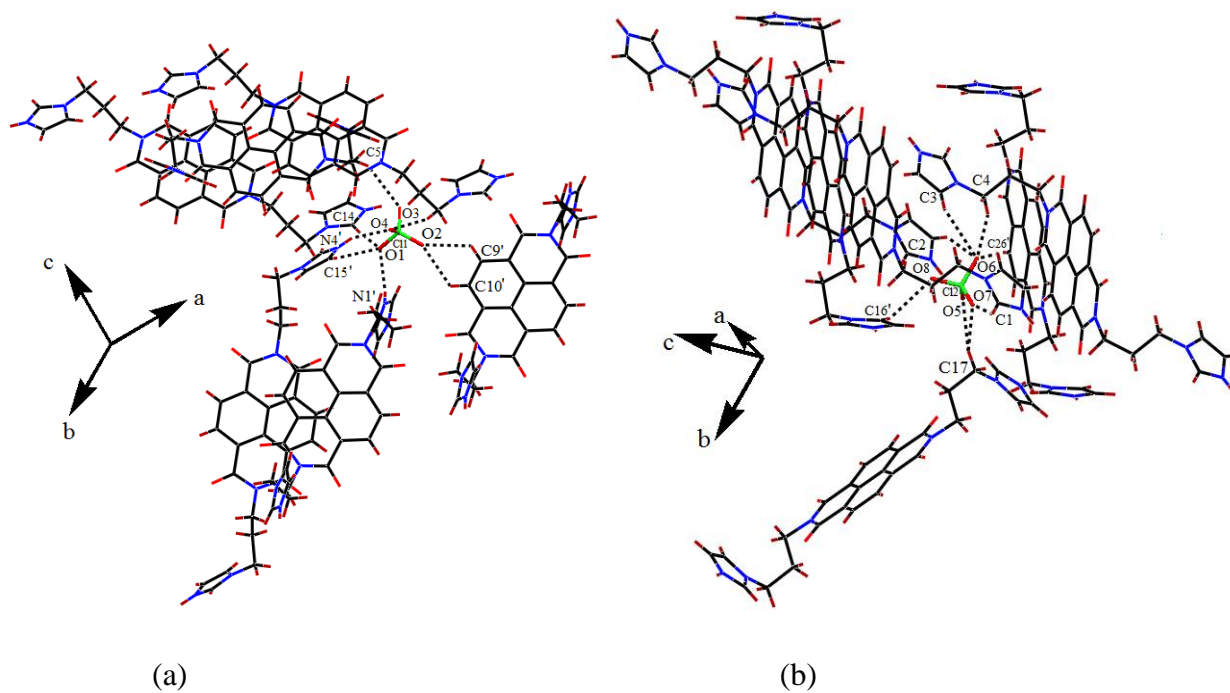

Fig. 5S (a) Coordination mode of perchlorate anion in the salt **3** (a) and (b) are two different perchlorate environments [Equivalent atoms are generated by  $(-x, -y, -z)$ ,  $(1/2-x, 1/2-y, 1/2-z)$  and  $(1/2+x, 1/2-y, 1/2+z)$ ]

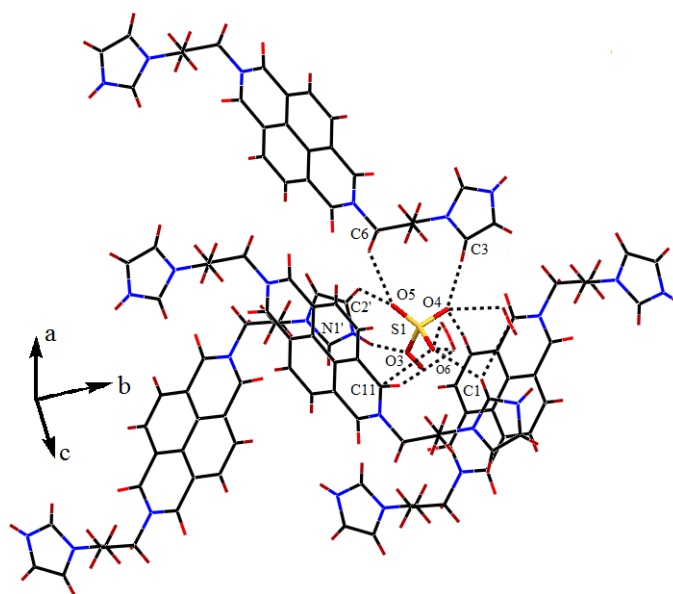

Fig. 6S: Hydrogen bond environment of bisulphate anion in salt **4** [Equivalent atoms are generated by  $(-x, -y, -z)$ ,  $(1/2-x, 1/2-y, 1/2-z)$  and  $(1/2+x, 1/2-y, 1/2+z)$ ]



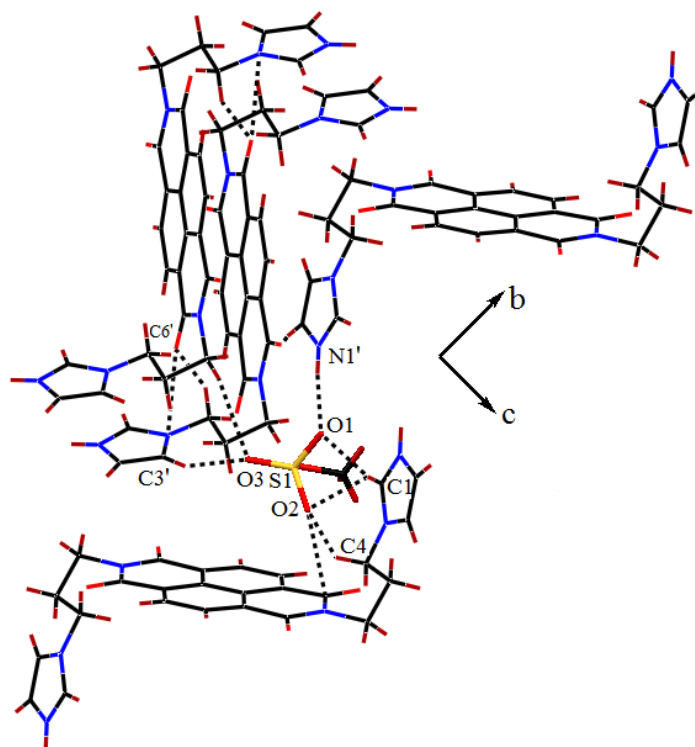

Fig. 7S: The hydrogen bond environment of methylsulphate in salt **5** (portions associated with anion are shown) [Equivalent atoms are generated by  $(-x, -y, -z)$ ,  $(-x, 1/2+y, 1/2-z)$  and  $(x, 1/2-y, 1/2+z)$ ]

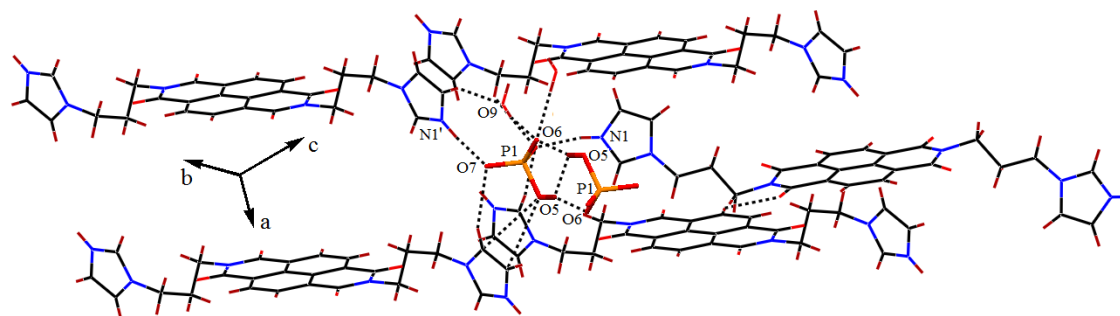

Fig. 8S: Hydrogen bond environment of the hydrogenphosphate anion in the salt **6**. (portions associated with anion are shown) [Equivalent atoms are generated by  $(-x, -y, -z)$ ]

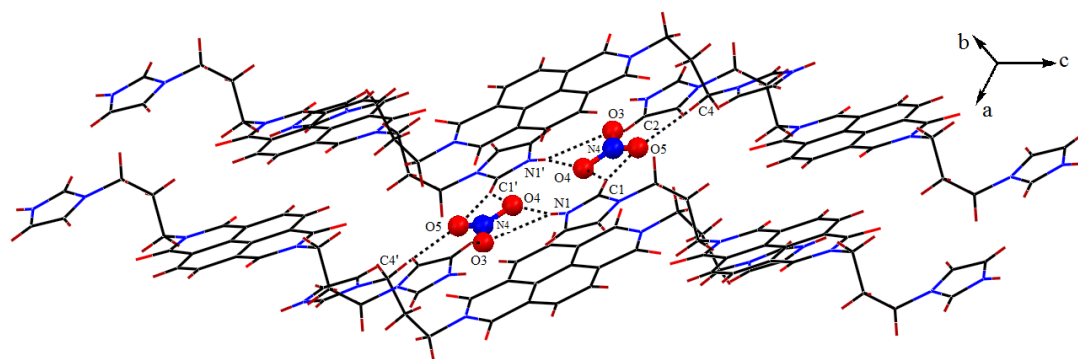

Fig. 9S: Nitrate anions forming layers with  $\text{H}_2\text{L}^{2+}$ . Equivalent atoms are generated by  $[-x, -y, -z]$ ,  $(1/2-x, 1/2+y, 1/2-z)$  and  $(1/2+x, 1/2-y, 1/2+z)$

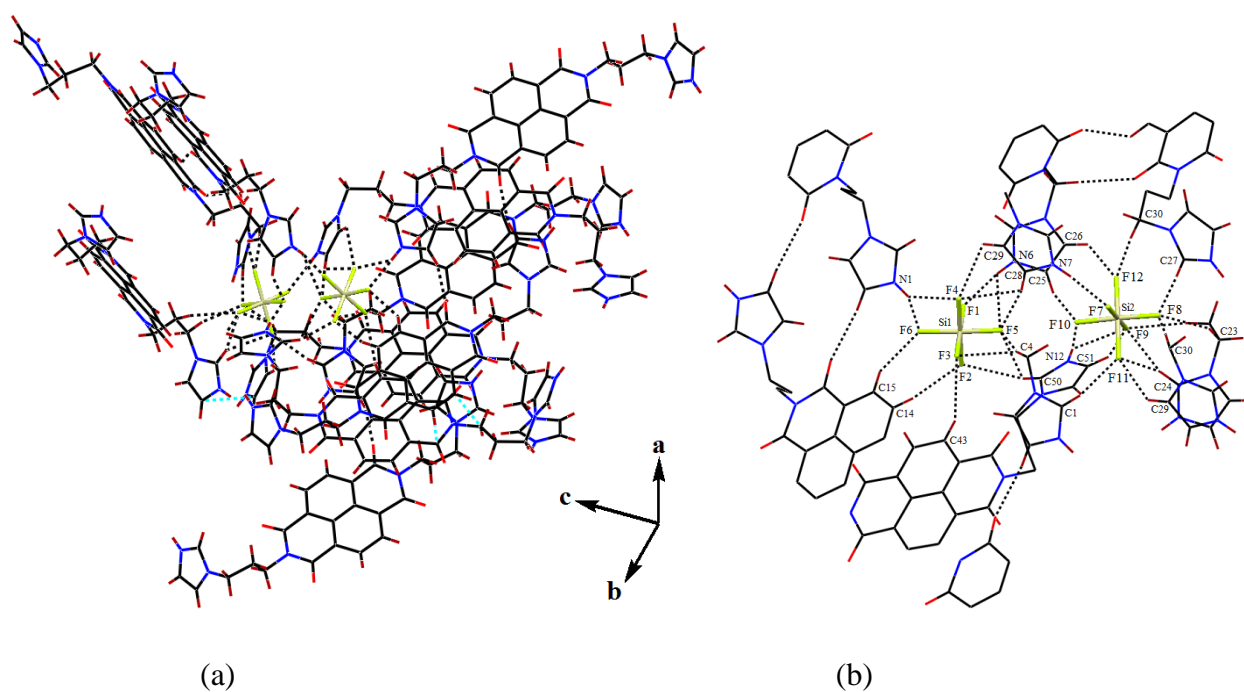

Fig. 10S: (a) The coordination environments around the two symmetry independent  $\text{SiF}_6^{2-}$  anions in the salt **8** (b) Only the interested portions in **8** associated with anion is shown. [Equivalent atoms are generated by  $(-x, -y, -z)$ ,  $(-x, 1/2+y, 1/2-z)$  and  $(x, 1/2-y, 1/2+z)$ ]

The hydrogen bond tables of the salts (generated from ins. files):

For salt 1:

|    |                                   |         |         |          |         |
|----|-----------------------------------|---------|---------|----------|---------|
| 1  | 1 N(1) --H(1A) ..Cl(1) [ 2666.03] | 0.86    | 2.26    | 3.112(3) | 175     |
| 2  | 2 N(4) --H(4) ..O(5) [ 2656.05]   | 0.86    | 1.87    | 2.706(6) | 165     |
| 3  | 5 O(5) --H(5M) ..O(6) [ 2665.06]  | 0.84(6) | 1.95(6) | 2.757(7) | 160(6)  |
| 4  | 5 O(5) --H(5N) ..Cl(2) [ 2665.04] | 0.84(4) | 2.29(4) | 3.087(4) | 159(4)  |
| 5  | 6 O(6) --H(6M) ..Cl(2) [ 1655.04] | 0.84(4) | 2.29(5) | 3.123(5) | 171(5)  |
| 6  | 6 O(6) --H(6N) ..Cl(1) [ 2666.03] | 0.84(3) | 2.36(4) | 3.195(6) | 178(11) |
| 7  | 1 C(1) --H(1) ..O(3) [ 2566.02]   | 0.93    | 2.27    | 3.122(5) | 151     |
| 8  | 1 C(2) --H(2) ..Cl(2) [ 1655.04]  | 0.93    | 2.70    | 3.567(5) | 155     |
| 9  | 1 C(3) --H(3) ..Cl(2) [ 2665.04]  | 0.93    | 2.78    | 3.689(4) | 167     |
| 10 | Intra 1 C(6) --H(6A) ..O(1) [ ]   | 0.97    | 2.34    | 2.709(5) | 102     |
| 11 | 2 C(14) --H(14) ..O(2) [ 2656.01] | 0.93    | 2.49    | 3.147(5) | 127     |
| 12 | 2 C(17) --H(17A) ..Cl(1) [ ]      | 0.97    | 2.67    | 3.541(4) | 149     |
| 13 | Intra 2 C(19) --H(19B) ..O(3) [ ] | 0.97    | 2.36    | 2.738(5) | 102     |
| 14 | 2 C(26) --H(26) ..O(1) [ 1655.01] | 0.93    | 2.44    | 3.102(5) | 128     |

Translation of ARU-Code to CIF and Equivalent Position Code

|            |             |
|------------|-------------|
| [ 2566.] = | -x,1-y,1-z  |
| [ 2666.] = | 1-x,1-y,1-z |
| [ 1655.] = | 1+x,y,z     |
| [ 2656.] = | 1-x,-y,1-z  |
| [ 2665.] = | 1-x,1-y,-z  |

For salt 2:

|    |                                     |         |         |          |        |
|----|-------------------------------------|---------|---------|----------|--------|
| 1  | 1 N(1) --H(1A) ..Br(1) [ 2656.03]   | 0.86    | 2.41    | 3.268(4) | 176    |
| 2  | 2 N(4) --H(4) ..O(5) [ ]            | 0.86    | 1.87    | 2.709(7) | 163    |
| 3  | 5 O(5) --H(5M) ..Br(2) [ 2665.04]   | 0.84(4) | 2.43(4) | 3.243(5) | 163(4) |
| 4  | 5 O(5) --H(5N) ..O(6) [ 2565.06]    | 0.85(6) | 1.93(7) | 2.749(8) | 162(8) |
| 5  | 6 O(6) --H(6M) ..Br(2) [ ]          | 0.83(6) | 2.44(5) | 3.252(7) | 165(6) |
| 6  | 6 O(6) --H(6N) ..Br(1) [ 1455.03]   | 0.83(3) | 2.54(3) | 3.364(6) | 175(7) |
| 7  | 1 C(1) --H(1) ..O(3) [ 2656.02]     | 0.93    | 2.30    | 3.158(7) | 154    |
| 8  | 1 C(2) --H(2) ..Br(2) [ 2556.04]    | 0.93    | 2.84    | 3.719(6) | 157    |
| 9  | 1 C(3) --H(3) ..Br(2) [ 1456.04]    | 0.93    | 2.91    | 3.820(6) | 166    |
| 10 | Intra 1 C(6) --H(6B) ..O(1) [ ]     | 0.97    | 2.35    | 2.718(6) | 101    |
| 11 | 2 C(14) --H(14) ..O(2) [ 2566.01]   | 0.93    | 2.51    | 3.159(7) | 127    |
| 12 | 2 C(17) --H(17B) ..Br(1) [ 1455.03] | 0.97    | 2.82    | 3.665(4) | 146    |
| 13 | Intra 2 C(19) --H(19A) ..O(3) [ ]   | 0.97    | 2.35    | 2.735(6) | 103    |
| 14 | 2 C(25) --H(25) ..O(1) [ 1455.01]   | 0.93    | 2.44    | 3.116(6) | 130    |

Translation of ARU-Code to CIF and Equivalent Position Code

|            |            |
|------------|------------|
| [ 2656.] = | 1-x,-y,1-z |
| [ 2556.] = | -x,-y,1-z  |
| [ 2566.] = | -x,1-y,1-z |
| [ 1456.] = | -1+x,y,1+z |
| [ 1455.] = | -1+x,y,z   |
| [ 2665.] = | 1-x,1-y,-z |
| [ 2565.] = | -x,1-y,-z  |

For salt 3:

|    |                                    |      |      |           |      |
|----|------------------------------------|------|------|-----------|------|
| 1  | 1 N(1) --H(1A) ..O(1) [ ]          | 0.86 | 2.33 | 3.134(8)  | 155  |
| 2  | 2 N(4) --H(4) ..O(4) [ 4454.03]    | 0.86 | 2.30 | 3.005(10) | 139  |
| 3  | 2 N(4) --H(4) ..O(12) [ 4554.02]   | 0.86 | 2.47 | 3.031(9)  | 123' |
| 4  | 1 C(1) --H(1) ..O(7) [ 1655.04]    | 0.93 | 2.42 | 3.166(10) | 137  |
| 5  | 1 C(4) --H(4B) ..O(6) [ 3656.04]   | 0.97 | 2.48 | 3.400(7)  | 158  |
| 6  | Intra 1 C(6) --H(6A) ..O(9) [ ]    | 0.97 | 2.31 | 2.731(6)  | 105  |
| 7  | 1 C(9) --H(9) ..O(2) [ 1556.03]    | 0.93 | 2.52 | 3.148(10) | 126  |
| 8  | 2 C(14) --H(14) ..O(1) [ ]         | 0.93 | 2.35 | 3.280(10) | 175  |
| 9  | 2 C(15) --H(15) ..O(1) [ 4454.03]  | 0.93 | 2.47 | 3.271(9)  | 144  |
| 10 | 2 C(17) --H(17A) ..O(4) [ 1455.03] | 0.97 | 2.49 | 3.429(9)  | 162  |
| 11 | 2 C(17) --H(17B) ..O(5) [ ]        | 0.97 | 2.48 | 3.430(7)  | 166  |

|    |                                    |      |      |          |     |
|----|------------------------------------|------|------|----------|-----|
| 12 | Intra 2 C(19) --H(19A) ..O(12) [ ] | 0.97 | 2.37 | 2.703(7) | 100 |
| 13 | 2 C(26) --H(26) ..O(6) [ 2555.04]  | 0.93 | 2.54 | 3.453(8) | 169 |

Translation of ARU-Code to CIF and Equivalent Position Code

|            |                     |
|------------|---------------------|
| [ 1655.] = | 1+x,y,z             |
| [ 3656.] = | 1-x,-y,1-z          |
| [ 1556.] = | x,y,1+z             |
| [ 4454.] = | -1/2+x,1/2-y,-1/2+z |
| [ 4554.] = | 1/2+x,1/2-y,-1/2+z  |
| [ 1455.] = | -1+x,y,z            |
| [ 2555.] = | 1/2-x,1/2+y,1/2-z   |

For salt 4:

|    |                                   |          |          |          |         |
|----|-----------------------------------|----------|----------|----------|---------|
| 1  | 1 N(1) --H(1A) ..O(3) [ 2655.02]  | 0.86     | 2.05     | 2.824(9) | 149     |
| 2  | 2 O(7) --H(7A) ..O(6) [ 4555.02]  | 0.85(7)  | 2.32(7)  | 2.753(8) | 112(6)  |
| 3  | 2 O(7) --H(7B) ..O(6) [ 4555.02]  | 0.84(16) | 2.25(15) | 2.753(8) | 118(10) |
| 4  | 1 C(1) --H(1) ..O(6) [ ]          | 0.93     | 2.49     | 3.296(8) | 146     |
| 5  | 1 C(1) --H(1) ..O(7) [ 2655.03]   | 0.93     | 2.51     | 3.132(9) | 124'    |
| 6  | 1 C(2) --H(2) ..O(5) [ 2655.02]   | 0.93     | 2.48     | 3.145(8) | 129     |
| 7  | 1 C(3) --H(3) ..O(4) [ 1455.02]   | 0.93     | 2.32     | 3.100(9) | 141     |
| 8  | Intra 1 C(6) --H(6A) ..O(1) [ ]   | 0.97     | 2.35     | 2.737(7) | 103     |
| 9  | 1 C(6) --H(6A) ..O(5) [ 1455.02]  | 0.97     | 2.51     | 3.291(7) | 137'    |
| 10 | 1 C(12) --H(12) ..O(4) [ 2645.02] | 0.93     | 2.53     | 3.377(7) | 151     |
| 11 | 1 C(13) --H(13) ..O(3) [ 4554.02] | 0.93     | 2.49     | 3.246(9) | 138     |

Translation of ARU-Code to CIF and Equivalent Position Code

|            |                  |
|------------|------------------|
| [ 2655.] = | 1-x,1/2+y,1/2-z  |
| [ 1455.] = | -1+x,y,z         |
| [ 2645.] = | 1-x,-1/2+y,1/2-z |
| [ 4554.] = | x,1/2-y,-1/2+z   |
| [ 4555.] = | x,1/2-y,1/2+z    |

For salt 5:

|   |                                  |      |      |          |      |
|---|----------------------------------|------|------|----------|------|
| 1 | 1 N(1) --H(1C) ..O(1) [ 2645.02] | 0.86 | 1.85 | 2.707(4) | 174  |
| 2 | 1 C(1) --H(1) ..O(1) [ 4554.02]  | 0.93 | 2.40 | 3.265(5) | 154  |
| 3 | 1 C(1) --H(1) ..O(2) [ 4554.02]  | 0.93 | 2.59 | 3.336(5) | 138' |
| 4 | 1 C(2) --H(2) ..O(5) [ 2645.01]  | 0.93 | 2.31 | 3.142(5) | 149  |
| 5 | 1 C(3) --H(3) ..O(3) [ ]         | 0.93 | 2.33 | 3.203(5) | 156  |
| 6 | 1 C(4) --H(4B) ..O(6) [ 1455.01] | 0.97 | 2.59 | 2.991(5) | 105  |
| 7 | Intra 1 C(6) --H(6A) ..O(5) [ ]  | 0.97 | 2.38 | 2.741(5) | 101  |

Translation of ARU-Code to CIF and Equivalent Position Code

|            |                  |
|------------|------------------|
| [ 4554.] = | x,1/2-y,-1/2+z   |
| [ 2645.] = | 1-x,-1/2+y,1/2-z |
| [ 1455.] = | -1+x,y,z         |

For salt 6:

|    |                                   |         |         |          |        |
|----|-----------------------------------|---------|---------|----------|--------|
| 1  | 1 N(1) --H(1A) ..O(8) [ 2756.03]  | 0.86    | 1.89    | 2.696(4) | 155    |
| 2  | 2 N(4) --H(4C) ..O(7) [ ]         | 0.89(3) | 1.70(3) | 2.582(4) | 175(4) |
| 3  | 3 O(5) --H(5) ..O(6) [ 2756.03]   | 0.82    | 1.74    | 2.526(4) | 159    |
| 4  | 4 O(9) --H(9A) ..O(6) [ 2666.03]  | 0.87    | 2.12    | 2.992(4) | 173    |
| 5  | 4 O(9) --H(9B) ..O(6) [ 1565.03]  | 0.97    | 1.82    | 2.774(4) | 164    |
| 6  | 1 C(3) --H(3) ..O(4) [ 1655.02]   | 0.93    | 2.52    | 3.401(4) | 159    |
| 7  | 2 C(14) --H(14) ..O(8) [ 2766.03] | 0.93    | 2.32    | 3.237(5) | 167    |
| 8  | 2 C(15) --H(15) ..O(9) [ 1545.04] | 0.93    | 2.52    | 3.375(5) | 153    |
| 9  | 2 C(16) --H(16) ..O(7) [ 1455.03] | 0.93    | 2.52    | 3.346(5) | 149    |
| 10 | Intra 2 C(19) --H(19A) ..N(5) [ ] | 0.97    | 2.60    | 2.939(4) | 101    |
| 11 | Intra 2 C(19) --H(19B) ..O(3) [ ] | 0.97    | 2.37    | 2.707(4) | 100    |

Translation of ARU-Code to CIF and Equivalent Position Code

|            |            |
|------------|------------|
| [ 2756.] = | 2-x,-y,1-z |
|------------|------------|

[ 1655.] = 1+x,y,z  
 [ 1545.] = x,-1+y,z  
 [ 2766.] = 2-x,1-y,1-z  
 [ 1455.] = -1+x,y,z  
 [ 2666.] = 1-x,1-y,1-z  
 [ 1565.] = x,1+y,z

For Salt 7:

|   |                                  |      |      |           |      |
|---|----------------------------------|------|------|-----------|------|
| 1 | 1 N(1) --H(1A) ..O(4) [ 4454.02] | 0.86 | 1.86 | 2.712(16) | 168  |
| 2 | 1 C(1) --H(1) ..O(4) [ 2545.02]  | 0.93 | 2.31 | 3.049(19) | 136  |
| 3 | 1 C(1) --H(1) ..O(5) [ 2545.02]  | 0.93 | 2.26 | 3.17(2)   | 167' |
| 4 | 1 C(2) --H(2) ..O(3) [ 2555.02]  | 0.93 | 2.46 | 3.02(2)   | 118  |
| 5 | 1 C(4) --H(4B) ..O(5) [ 1455.02] | 0.97 | 2.38 | 3.16(2)   | 137  |
| 6 | Intra 1 C(5) --H(5B) ..O(1) [ ]  | 0.97 | 2.59 | 3.113(19) | 114  |
| 7 | Intra 1 C(6) --H(6B) ..O(2) [ ]  | 0.97 | 2.38 | 2.758(19) | 103  |

Translation of ARU-Code to CIF and Equivalent Position Code

=====  
 [ 4454.] = -1/2+x,1/2-y,-1/2+z  
 [ 2545.] = 1/2-x,-1/2+y,1/2-z  
 [ 2555.] = 1/2-x,1/2+y,1/2-z  
 [ 1455.] = -1+x,y,z

For salt 8 :

|    |                                     |      |      |           |      |
|----|-------------------------------------|------|------|-----------|------|
| 1  | 1 N(1) --H(1) ..O(2) [ 3665.01]     | 0.86 | 2.59 | 3.337(17) | 146  |
| 2  | 1 N(6) --H(6) ..F(10) [ 1575.04]    | 0.86 | 2.48 | 3.098(16) | 130  |
| 3  | 2 N(7) --H(7) ..F(7) [ 4544.04]     | 0.86 | 1.96 | 2.811(10) | 171  |
| 4  | 2 N(12) --H(12) ..F(9) [ 2655.04]   | 0.86 | 2.50 | 2.958(12) | 114  |
| 5  | 1 C(2) --H(2) ..F(4) [ 3655.03]     | 0.93 | 1.99 | 2.780(15) | 141  |
| 6  | 1 C(2) --H(2) ..F(6) [ 3655.03]     | 0.93 | 2.13 | 2.913(16) | 142' |
| 7  | 1 C(3) --H(3) ..F(11) [ 4554.04]    | 0.93 | 2.26 | 3.173(14) | 168  |
| 8  | 1 C(4) --H(4B) ..F(5) [ 3665.03]    | 0.97 | 2.38 | 3.333(13) | 170  |
| 9  | Intra 1 C(6) --H(6A) ..O(1) [ ]     | 0.97 | 2.33 | 2.702(13) | 102  |
| 10 | 1 C(14) --H(14) ..F(2) [ 1565.03]   | 0.93 | 2.46 | 3.299(12) | 150  |
| 11 | 1 C(15) --H(15) ..F(6) [ 1565.03]   | 0.93 | 2.30 | 3.102(12) | 144  |
| 12 | Intra 1 C(21) --H(21B) ..O(4) [ ]   | 0.97 | 2.36 | 2.720(12) | 101  |
| 13 | Intra 1 C(21) --H(21B) ..N(5) [ ]   | 0.97 | 2.60 | 2.957(14) | 102' |
| 14 | 1 C(23) --H(23A) ..O(5) [ 3575.02]  | 0.97 | 2.32 | 3.248(12) | 161  |
| 15 | 1 C(23) --H(23B) ..F(8) [ 1565.04]  | 0.97 | 2.32 | 3.138(11) | 142  |
| 16 | 1 C(24) --H(24) ..F(12) [ 1575.04]  | 0.93 | 2.46 | 3.029(18) | 120  |
| 17 | 1 C(25) --H(25) ..F(1) [ 2665.03]   | 0.93 | 1.82 | 2.741(12) | 168  |
| 18 | 1 C(26) --H(26) ..F(9) [ 1565.04]   | 0.93 | 2.21 | 3.112(11) | 164  |
| 19 | 1 C(26) --H(26) ..F(11) [ 1565.04]  | 0.93 | 2.50 | 3.189(12) | 131' |
| 20 | 2 C(27) --H(27) ..F(8) [ 3555.04]   | 0.93 | 2.09 | 3.023(14) | 177  |
| 21 | 2 C(28) --H(28) ..F(5) [ 3655.03]   | 0.93 | 2.40 | 3.311(14) | 166  |
| 22 | 2 C(29) --H(29) ..F(11) [ 4554.04]  | 0.93 | 2.44 | 3.170(12) | 136  |
| 23 | 2 C(30) --H(30A) ..F(12) [ 3555.04] | 0.97 | 2.25 | 3.211(12) | 172  |
| 24 | 2 C(30) --H(30B) ..F(8) [ 4554.04]  | 0.97 | 2.33 | 3.276(11) | 165  |
| 25 | Intra 2 C(32) --H(32B) ..O(6) [ ]   | 0.97 | 2.36 | 2.702(13) | 100  |
| 26 | 2 C(35) --H(35) ..O(3) [ 3575.01]   | 0.93 | 2.44 | 3.163(12) | 135  |
| 27 | Intra 2 C(47) --H(47B) ..O(8) [ ]   | 0.97 | 2.36 | 2.732(12) | 102  |
| 28 | 2 C(49) --H(49A) ..F(1) [ 2655.03]  | 0.97 | 2.51 | 3.237(11) | 132  |
| 29 | 2 C(50) --H(50) ..F(2) [ 2655.03]   | 0.93 | 2.35 | 3.270(13) | 171  |
| 30 | 2 C(51) --H(51) ..F(9) [ 2655.04]   | 0.93 | 2.35 | 2.883(12) | 116  |
| 31 | 2 C(51) --H(51) ..F(10) [ 2655.04]  | 0.93 | 1.77 | 2.702(13) | 175' |
| 32 | 2 C(52) --H(52) ..F(5) [ ]          | 0.93 | 2.41 | 3.011(12) | 122  |

Translation of ARU-Code to CIF and Equivalent Position Code

=====  
 [ 3665.] = 1-x,1-y,-z  
 [ 3575.] = -x,2-y,-z  
 [ 1575.] = x,2+y,z  
 [ 2665.] = 1-x,3/2+y,1/2-z  
 [ 3655.] = 1-x,-y,-z

[ 4554.] = x,1/2-y,-1/2+z  
 [ 1565.] = x,1+y,z  
 [ 4544.] = x,-1/2-y,-1/2+z  
 [ 2655.] = 1-x,1/2+y,1/2-z  
 [ 3555.] = -x,-y,-z

Table S2: Hydrogen bond parameters in the salts **1-8**

| Salt                             | D-H...A                            | $d_{D-H}$ (Å) | $d_{H...A}$ (Å) | $d_{D...A}$ (Å) | $d_{D-H...A}$ (°) |
|----------------------------------|------------------------------------|---------------|-----------------|-----------------|-------------------|
| Chloride salt<br>(salt 1)        | N1-H1A...Cl1 [1-x,1-y,1-z]         | 0.86          | 2.26            | 3.112(3)        | 175               |
|                                  | N4-H4...O5 [1-x,-y,1-z]            | 0.86          | 1.87            | 2.706(6)        | 165               |
|                                  | O5-H5M...O6 [1-x,1-y,-z]           | 0.84(6)       | 1.95(6)         | 2.757(7)        | 160(6)            |
|                                  | O5-H5N...Cl2 [1-x,1-y,-z]          | 0.84(4)       | 2.29(4)         | 3.087(4)        | 159(4)            |
|                                  | O6-H6M...Cl2 [1+x,y,z]             | 0.84(4)       | 2.29(5)         | 3.123(5)        | 171(5)            |
|                                  | O6-H6N...Cl1 [1-x,1-y,1-z]         | 0.84(3)       | 2.36(4)         | 3.195(6)        | 178(11)           |
|                                  | C1-H1...O3 [-x,1-y,1-z]            | 0.93          | 2.27            | 3.122(5)        | 151               |
|                                  | C2-H2...Cl2 [1+x,y,z]              | 0.93          | 2.70            | 3.567(5)        | 155               |
|                                  | C3-H3...Cl2 [1-x,1-y,-z]           | 0.93          | 2.78            | 3.69(4)         | 167               |
|                                  | C14-H14...O2 [1-x,-y,1-z]          | 0.93          | 2.49            | 3.147(5)        | 127               |
|                                  | C17-H17A...Cl1                     | 0.97          | 2.67            | 3.541(4)        | 149               |
| Bromide salt<br>(salt 2)         | N1-H1A...Br1 [1-x,-y,1-z]          | 0.86          | 2.41            | 3.268(4)        | 176               |
|                                  | N4-H4...O5                         | 0.86          | 1.87            | 2.709(7)        | 163               |
|                                  | O5-H5M...Br2 [1-x,1-y,-z]          | 0.84(4)       | 2.43(4)         | 3.243(5)        | 163(4)            |
|                                  | O5-H5N...O6 [-x,1-y,-z]            | 0.85(6)       | 1.93(7)         | 2.749(8)        | 162(8)            |
|                                  | O6-H6M...Br2                       | 0.83(6)       | 2.44(5)         | 3.252(7)        | 165(6)            |
|                                  | O6-H6N...Br1 [-1+x,y,z]            | 0.83(3)       | 2.54(3)         | 3.364(6)        | 175(7)            |
|                                  | C1-H1...O3 [1-x,-y,1-z]            | 0.93          | 2.30            | 3.158(7)        | 154               |
|                                  | C1-H1...Br2 [-x,-y,1-z]            | 0.93          | 2.84            | 3.719(6)        | 157               |
|                                  | C3-H3...Br2 [-1+x,y,1+z]           | 0.93          | 2.91            | 3.820(6)        | 166               |
|                                  | C6-H6B...O1                        | 0.97          | 2.35            | 2.718(6)        | 101               |
|                                  | C14-H14...O2 [-x,1-y,1-z]          | 0.93          | 2.51            | 3.159(7)        | 127               |
| C17-H17B...Br1 [-1+x,y,z]        | 0.97                               | 2.82          | 3.665(4)        | 146             |                   |
| C19-H19A...O3                    | 0.97                               | 2.35          | 2.735(6)        | 103             |                   |
| Perchlorate salt<br>(salt 3)     | N(1)-H(1A)...O1                    | 0.86          | 2.33            | 3.134(8)        | 155               |
|                                  | N4-H4...O4 [-1/2+x,1/2-y,-1/2+z]   | 0.86          | 2.30            | 3.005(10)       | 139               |
|                                  | N4-H4...O12 [1/2+x,1/2-y,-1/2+z]   | 0.86          | 2.47            | 3.031(9)        | 123               |
|                                  | C1-H1...O7 [1+x,y,z]               | 0.93          | 2.42            | 3.166(10)       | 137               |
|                                  | C4-H4B...O6 [1-x,-y,1-z]           | 0.97          | 2.48            | 3.400(7)        | 158               |
|                                  | C6-H6A...O9                        | 0.97          | 2.31            | 2.731(6)        | 105               |
|                                  | C9-H9...O2 [x,y,1+z]               | 0.93          | 2.52            | 3.148(10)       | 126               |
|                                  | C14-H14...O1                       | 0.93          | 2.35            | 3.280(10)       | 175               |
|                                  | C15-H15...O1 [-1/2+x,1/2-y,-1/2+z] | 0.93          | 2.47            | 3.271(9)        | 144               |
|                                  | C17-H17A...O4 [-1+x,y,z]           | 0.97          | 2.49            | 3.429(9)        | 162               |
|                                  | C17-H17B...O5                      | 0.97          | 2.48            | 3.430(7)        | 166               |
| C26-H26...O6 [1/2-x,1/2+y,1/2-z] | 0.93                               | 2.54          | 3.453(8)        | 169             |                   |
| Bisulphate salt<br>(salt 4)      | N1-H1A...O3 [1-x,1/2+y,1/2-z]      | 0.86          | 2.05            | 2.824(9)        | 149               |
|                                  | O7-H7A...O6 [x,1/2-y,1/2+z]        | 0.85(7)       | 2.32(7)         | 2.753(8)        | 112(6)            |
|                                  | O7-H7B...O6 [x,1/2-y,1/2+z]        | 0.84(16)      | 2.25(15)        | 2.753(8)        | 118(10)           |
|                                  | C1-H1...O6                         | 0.93          | 2.49            | 3.296(8)        | 146               |
|                                  | C1-H1...O7 [1-x,1/2+y,1/2-z]       | 0.93          | 2.51            | 3.132(9)        | 124               |
|                                  | C2-H2...O5 [1-x,1/2+y,1/2-z]       | 0.93          | 2.48            | 3.145(8)        | 129               |
|                                  | C3-H3...O4 [-1+x,y,z]              | 0.93          | 2.32            | 3.100(9)        | 141               |
|                                  | C5-H5...O3                         | 0.82          | 2.67            | 3.447           | 137               |
|                                  | C6-H6A...O1                        | 0.97          | 2.35            | 2.737(7)        | 103               |
|                                  | C6-H6A...O5 [-1+x,y,z]             | 0.97          | 2.51            | 3.291(7)        | 137               |
|                                  | C12-H12...O4 [1-x,-1/2+y,1/2-z]    | 0.93          | 2.53            | 3.377(7)        | 151               |
| C13-H13...O3 [x,1/2-y,-1/2+z]    | 0.93                               | 2.49          | 3.246(9)        | 138             |                   |
| Methyl sulphate<br>(salt 5)      | N1-H1C...O1 [1-x,-1/2+y,1/2-z]     | 0.86          | 1.85            | 2.707(4)        | 174               |
|                                  | C1-H1...O1 [x,1/2-y,-1/2+z]        | 0.93          | 2.40            | 3.265(5)        | 154               |
|                                  | C1-H1...O2 [x,1/2-y,-1/2+z]        | 0.93          | 2.59            | 3.336(5)        | 138               |
|                                  | C2-H2...O5 [1-x,-1/2+y,1/2-z]      | 0.93          | 2.31            | 3.142(5)        | 149               |
|                                  | C3-H3...O3                         | 0.93          | 2.33            | 3.203(5)        | 156               |
|                                  | C4-H4B...O6 [-1+x,y,z]             | 0.97          | 2.59            | 2.991(5)        | 105               |

|                                   |                                        |         |          |           |        |
|-----------------------------------|----------------------------------------|---------|----------|-----------|--------|
|                                   | C6-H6A...O5 [intra]                    | 0.97    | 2.38     | 2.741(5)  | 101    |
| Hydrogen phosphate salt (salt 6)  | N(1)-H(1A)...O(8) [2-x,-y,1-z]         | 0.86    | 1.89     | 2.696(4)  | 155    |
|                                   | N(4)-H(4C)...O(7)                      | 0.89(3) | 1.70(3)  | 2.582(4)  | 175(4) |
|                                   | O(5)-H(5)...O(6) [2-x,-y,1-z]          | 0.82    | 1.74     | 2.526(4)  | 159    |
|                                   | O(9)-H(9A)...O(6) [1-x,1-y,1-z]        | 0.87    | 2.12     | 2.992(4)  | 173    |
|                                   | O(9)-H(9B)...O(6) [x,1+y,z]            | 0.97    | 1.82     | 2.774(4)  | 164    |
|                                   | C(14)-H(14)...O(8) [2-x,1-y,1-z]       | 0.93    | 2.32     | 3.237(5)  | 167    |
|                                   | C(15)-H(15)...O(9) [x,-1+y,z]          | 0.93    | 2.52     | 3.375(5)  | 153    |
|                                   | C(16)-H(16)...O(7) [-1+x,y,z]          | 0.93    | 2.52     | 3.346(5)  | 149    |
|                                   | C(19)-H(19A)...N(5) [intra]            | 0.97    | 2.60     | 2.939(4)  | 101    |
| C(19)-H(19B)...O(3) [intra]       | 0.97                                   | 2.37    | 2.707(4) | 100       |        |
| Nitrate salt (salt 7)             | N1-H1A...O4 [-1/2+x,1/2-y,-1/2+z]      | 0.86    | 1.86     | 2.712(16) | 168    |
|                                   | C1-H1...O4 [1/2-x,-1/2+y,1/2-z]        | 0.93    | 2.31     | 3.049(19) | 136    |
|                                   | C1-H1...O5 [1/2-x,-1/2+y,1/2-z]        | 0.93    | 2.26     | 3.17(2)   | 167    |
|                                   | C2-H2...O3 [1/2-x,1/2+y,1/2-z]         | 0.93    | 2.46     | 3.02(2)   | 118    |
|                                   | C4-H4B...O5 [-1+x,y,z]                 | 0.97    | 2.38     | 3.16(2)   | 137    |
|                                   | C5-H5B...O1                            | 0.97    | 2.59     | 3.113(19) | 114    |
|                                   | C6-H6B...O2                            | 0.97    | 2.38     | 2.758(19) | 103    |
| Hexa-fluorosilicate salt (salt 8) | N1-H1...O2 [1-x, 1-y, -z]              | 0.86    | 2.59     | 3.337(17) | 146    |
|                                   | N6-H6...F10 [x, 2+y, z]                | 0.86    | 2.48     | 3.098(16) | 130    |
|                                   | N7-H7...F7 [x, -1/2-y, -1/2+z]         | 0.86    | 1.96     | 2.811(10) | 171    |
|                                   | N12-H12...F9 [1-x,1/2+y,1/2-z]         | 0.86    | 2.50     | 2.958(12) | 114    |
|                                   | C(2)-H(2)...F(4) [1-x,1-y, -z]         | 0.93    | 1.99     | 2.780(15) | 141    |
|                                   | C(2)-H(2)...F(6) [1-x, 1-y, -z]        | 0.93    | 2.13     | 2.913(16) | 142    |
|                                   | C(3)-H(3)...F(11) [x, 1/2-y, -1/2+z]   | 0.93    | 2.26     | 3.173(14) | 168    |
|                                   | C(4)-H(4B)...F(5) [1-x,1-y,-z]         | 0.97    | 2.38     | 3.333(13) | 170    |
|                                   | C(6)-H(6A)...O(1) [intra]              | 0.97    | 2.33     | 2.702(13) | 102    |
|                                   | C(14)-H(14)...F(2) [x, 1+y, z]         | 0.93    | 2.46     | 3.299(12) | 150    |
|                                   | C(15)-H(15)...F(6) [x, 1+y, z]         | 0.93    | 2.30     | 3.102(12) | 144    |
|                                   | C(21)-H(21B)...O(4) [intra]            | 0.97    | 2.36     | 2.720(12) | 101    |
|                                   | C(21)-H(21B)...N(5) [intra]            | 0.97    | 2.60     | 2.957(14) | 102    |
|                                   | C(23)-H(23A)...O(5) [-x, 2-y, -z]      | 0.97    | 2.32     | 3.248(12) | 161    |
|                                   | C(23)-H(23B)...F(8) [x, 1+y, z]        | 0.97    | 2.32     | 3.138(11) | 142    |
|                                   | C(24)-H(24)...F(12) [x, 2+y, z]        | 0.93    | 2.46     | 3.029(18) | 120    |
|                                   | C(25)-H(25)...F(1) [1-x, 1/2+y, 1/2-z] | 0.93    | 1.82     | 2.741(12) | 168    |
|                                   | C(26)-H(26)...F(9) [x, 1+y, z]         | 0.93    | 2.21     | 3.112(11) | 164    |
|                                   | C(26)-H(26)...F(11) [x, 1+y, z]        | 0.93    | 2.50     | 3.189(12) | 131    |
|                                   | C(27)-H(27)...F(8) [-x, -y, -z]        | 0.93    | 2.09     | 3.023(14) | 177    |
|                                   | C(28)-H(28)...F(5) [1-x, 1-y, -z]      | 0.93    | 2.40     | 3.311(14) | 166    |
|                                   | C(29)-H(29)...F(11) [x, 1/2-y, -1/2+z] | 0.93    | 2.44     | 3.170(12) | 136    |
|                                   | C(30)-H(30A)...F(12) [-x, -y, -z]      | 0.97    | 2.25     | 3.211(12) | 172    |
|                                   | C(30)-H(30B)...F(8) [x,1/2-y, -1/2+z]  | 0.97    | 2.33     | 3.276(11) | 165    |
|                                   | C(32)-H(32B)...O(6) [Intra]            | 0.97    | 2.36     | 2.702(13) | 100    |
|                                   | C(35)-H(35)...O(3) [-x, 2-y, -z]       | 0.93    | 2.44     | 3.163(12) | 135    |
|                                   | C(47)-H(47B)...O(8) [Intra]            | 0.97    | 2.36     | 2.732(12) | 102    |
|                                   | C(49)-H(49A)...F(1) [1-x,1/2+y, 1/2-z] | 0.97    | 2.51     | 3.237(11) | 132    |
|                                   | C(50)-H(50)...F(2) [1-x,1/2+y,1/2-z]   | 0.93    | 2.35     | 3.270(13) | 171    |
|                                   | C(51)-H(51)...F(9) [1-x,1/2+y,1/2-z]   | 0.93    | 2.35     | 2.883(12) | 116    |
|                                   | C(51)-H(51)...F(10) [1-x,1/2+y,1/2-z]  | 0.93    | 1.77     | 2.702(13) | 175    |
|                                   | C(52)-H(52)...F(5)                     | 0.93    | 2.41     | 3.011(12) | 122    |
